# Supplementary material for: New quantum spin Hall insulator in two-dimensional MoS2with periodically distributed pores
Source: Royal Society of Chemistry journal article supplement (doi:10.1039/c5nr08842a), 2016-01-01
Supplement: c5nr08842a1.pdf [file c5nr08842a1.pdf]

## Electronic Supplementary Information

# New Quantum Spin Hall Insulator in Two-dimensional MoS<sub>2</sub> with Periodically Distributed Pores

Peng-Fei Liu,<sup>†,‡</sup> Liujiang Zhou,<sup>\*†,‡</sup> Thomas Frauenheim,<sup>⊥</sup> Li-Ming Wu<sup>\*†</sup>

<sup>†</sup> *State Key Laboratory of Structural Chemistry, Fujian Institute of Research on the Structure of Matter, Chinese Academy of Sciences, Fuzhou, Fujian 350002, People's Republic of China*

<sup>‡</sup> *University of Chinese Academy of Sciences, Beijing 100039, People's Republic of China*

<sup>⊥</sup> *Bremen Center for Computational Materials Science, University of Bremen, Am Falturm 1, 28359 Bremen, Germany*

<sup>&</sup> *Max Planck Institute for Chemical Physics of Solids, Noethnitzer Strasse 40, 01187 Dresden, Germany*

## SURPOTING INFORMATION

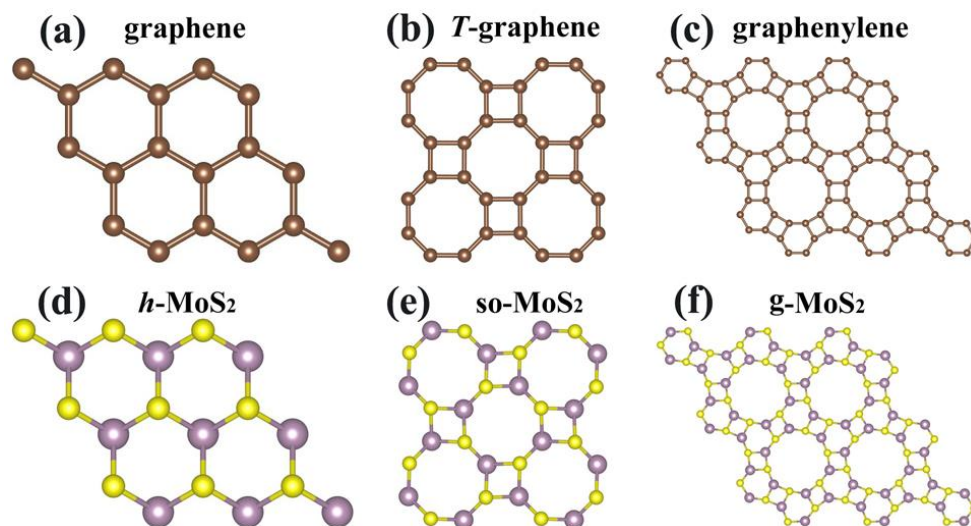

Figure S1 Top view of (a) graphene, (b) *T*-graphene,<sup>1</sup> (c) graphenylene,<sup>2</sup> (d) h-MoS<sub>2</sub>, (e) so-MoS<sub>2</sub> (ref 3) and (f) g-MoS<sub>2</sub>.

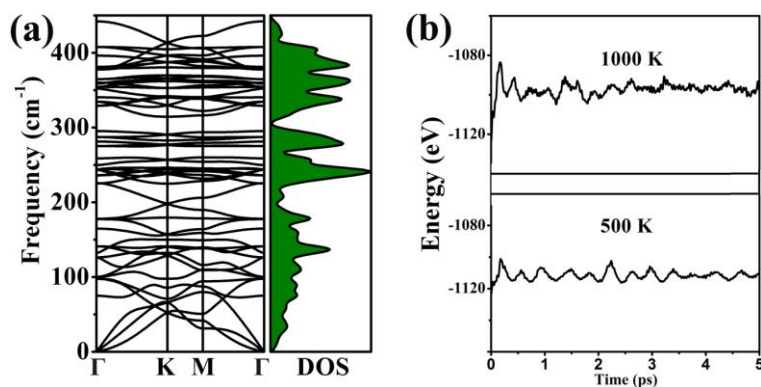

Figure S2 (a) Phonon band structure and DOS of g-MoS<sub>2</sub>. (b) Energy fluctuation with respect to time in MD simulations at 500 K and 1000 K for the g-MoS<sub>2</sub>. The k-point:  $\Gamma(0,0,0)$ ,  $K(-1/3,2/3,0)$ ,  $M(0,1/2,0)$ .

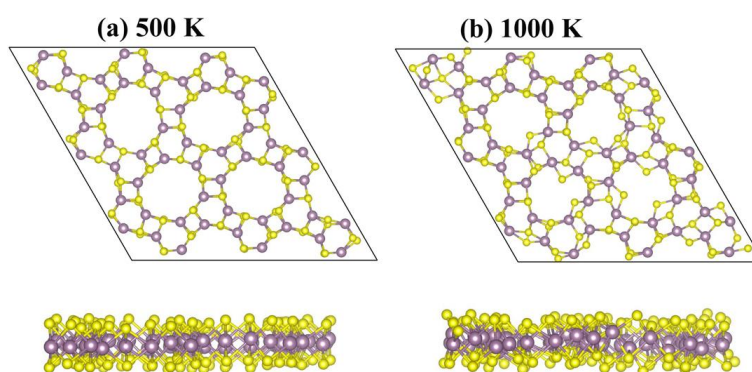

Figure S3 Top and side view of a snapshot of monolayer g-MoS<sub>2</sub> of the *ab-initio* molecular dynamics simulation at (a) 500 K and (b) 1000 K.

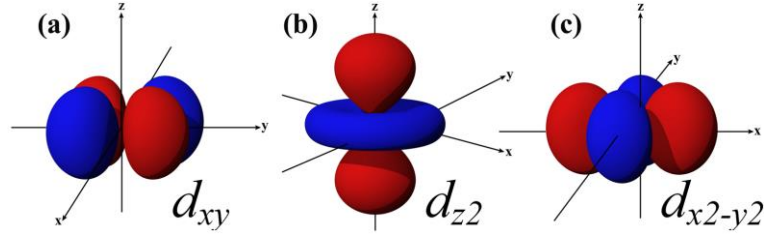

Figure S4. The shapes of the three atomic d orbitals. (a)  $d_{xy}$  (b)  $d_{z2}$  and (c)  $d_{x^2-y^2}$ .

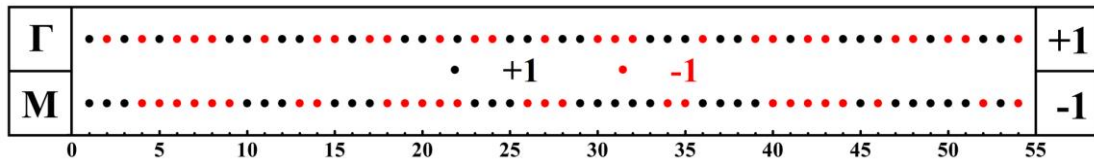

Figure S5. The parities of fifty-four occupied bands at  $\Gamma$  and three M points for g-MoS<sub>2</sub>. The total number of +1 (-1) at  $\Gamma$  point is twenty-eight (twenty-six), while twenty-seven (twenty-seven) for M point. So it yields that the product of  $\Gamma$  and M points are +1 and -1, respectively.

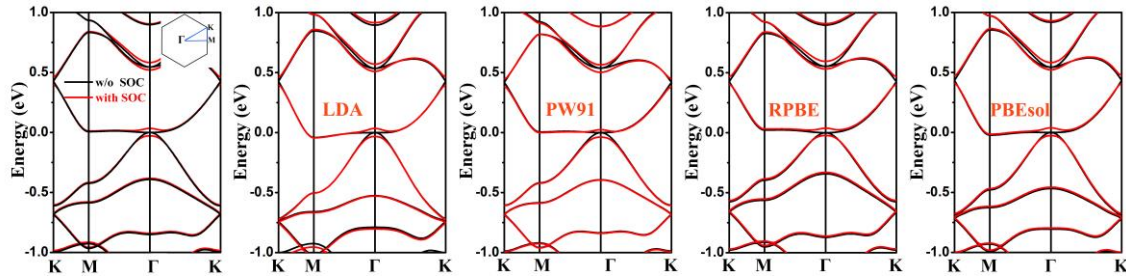

Figure S6. The calculated band structure for g-MoS<sub>2</sub> with SOC (red line) and without SOC (black line), obtained with the (a) PBE, (b) LDA, (c) PW91, (d) RPBE and (e) PBEsol functionals. The inset figure in (a) is first Brillouin zone of g-MoS<sub>2</sub> monolayer and the points of high symmetry.

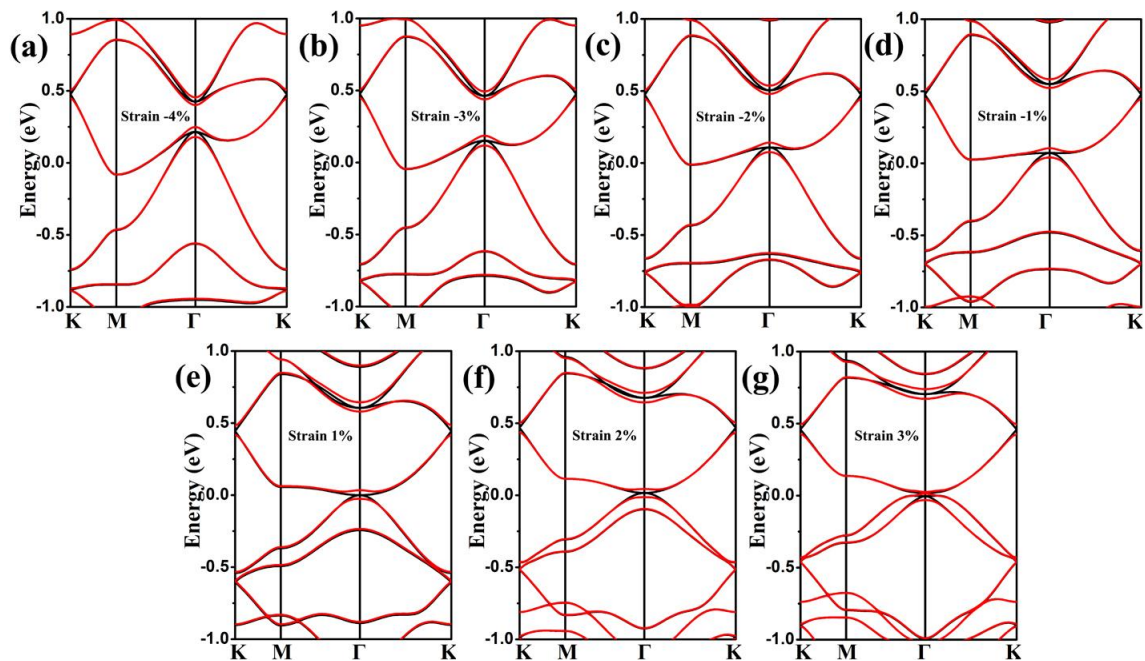

Figure S7. The calculated band structure for g-MoS<sub>2</sub> with SOC (red line) and without SOC (black line) under applied external biaxial strain in the range of -4% ~ 3%, obtained with the DFT-PBE.

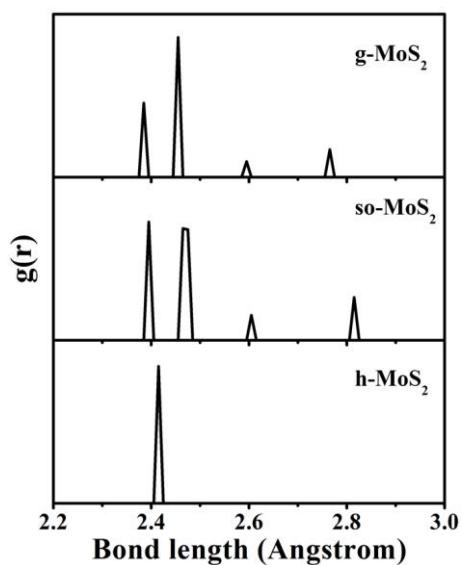

Figure S8. The Forcite analysis of bond distribution for optimized h-MoS<sub>2</sub>, so-MoS<sub>2</sub> and g-MoS<sub>2</sub> monolayer. Bin size is 0.01.

## References

1. Y. Liu, G. Wang, Q. S. Huang, L. W. Guo and X. L. Chen, *Phys. Rev. Lett.*, 2012, **108**, 225505.
2. Q. Song, B. Wang, K. Deng, X. L. Feng, M. Wagner, J. D. Gale, K. Müllen and L. J. Zhi, *J. Mater. Chem.*, 2013, **1**, 38.

3. W. F. Li, M. Guo, G. Zhang and Y. W. Zhang, *Phys. Rev. B.*, 2014, **89**, 205402.
